# Supplementary material for: 3L, three-Lactobacilli on recovering of microbiome and immune-damage by cyclophosphamide chemotherapy —A pilot experiment in rats—
Source: Research Square preprint supplement (doi:10.21203/rs.3.rs-2451339/v1), 2023-01-13
Supplement: Supplementary file 1 [file d84261873b560b34d842728f.docx]

| CK | IM | H | M | L |
| --- | --- | --- | --- | --- |
| *Acaulium*  *Acremonium*  *Alternaria*  *Aspergillus* *Candida** *Chlamydomyces*  *Coprinellus* *Cutaneotrichosporon**Filobasidium**Fusarium** *Gibberella* *Kernia**Kodamaea**Lecanicillium* *Mallassezia* *Meyerozima* *Microascus*  *Moesziomyces*  *Mortierella*  *Mucor*  *Mycosphaerella*  *Olpidium* *Papiliotrema* *Penicillium*  *Periconia* *Pichia** *Phallus*  *Phialocephala*  *Plectosphaerella*  *Pseudogymnoascus*  *Rasamsonia*  *Rhizomucor*  *Rhizophlyctis*  *Rhizopus* *Rhodotorula* *Saccharomyces*  *Sarocladium*  *Scytalidium*  *Shizothecium*  *Simplicillium*  *Sodiomyces*  *Talaromyces*  *Tausonia*  *Thermoascus*  *Trichoderma*  *Ustilago* *Verticillium**Wallemia* *Xerochrysium*  *Xeromyces* | *Acaulium*                                    *Mucor*  *Olpidium*  *Penicillium**Periconia*  *Phallus*                                        *Xerochrysium**Xeromyces* | *Acremonium*  *Aspergillus*  *Chlamydomyces**      Fusarium*              *Mortierella*              *Phallus*      *Rasamsonia*  *Rhizophlyctis*Rhizopus°              *Talaromyces*    *Trichoderma* | *Coprinellus*                *Microascus*      *Mycosphaerella*            *Phialocephala**Pseudogymnoascus*  *Rhizomucor**Rhizopus°*  *Sarocladium**Scytalidium*    *Thermoascus*  *Ustilago* | *Mallassezia*                        *Plectosphaerella*    Rhizopus°  *Saccharomyces*      *Simplicillium**Sodiomyces*  *Tausonia* |

**Table 1.** Mycobiome (Genus of fungi and yeasts) composition in relation to *Lactobacillus* and cyclophosphamide treatment in five groups of rats. CK: control healthy conditions; IM: immune-attacked (CTX); L: CTX + 3L-low dose; M: CTX + 3L-middle dose; H: CTX + 3L-high dose. Treatment for *Lactobacillus*: tritherapy (3L) = *L. acidophilus* *SD65* + *L. casei SD07 + L. plantarum SD02*. The group’s dominant genera are highlighted in bold. ° shows fungal genera specifically increased by 3L M-dose in cyclophosphamide conditions. * indicates increased genera in CK and/or H groups.
