# Supplementary figures and images for: 3L, three-Lactobacilli on recovering of microbiome and immune-damage by cyclophosphamide chemotherapy —A pilot experiment in rats—
Source: Research Square preprint supplement (doi:10.21203/rs.3.rs-2451339/v1), 2023-01-13

Rank Abundance Curve

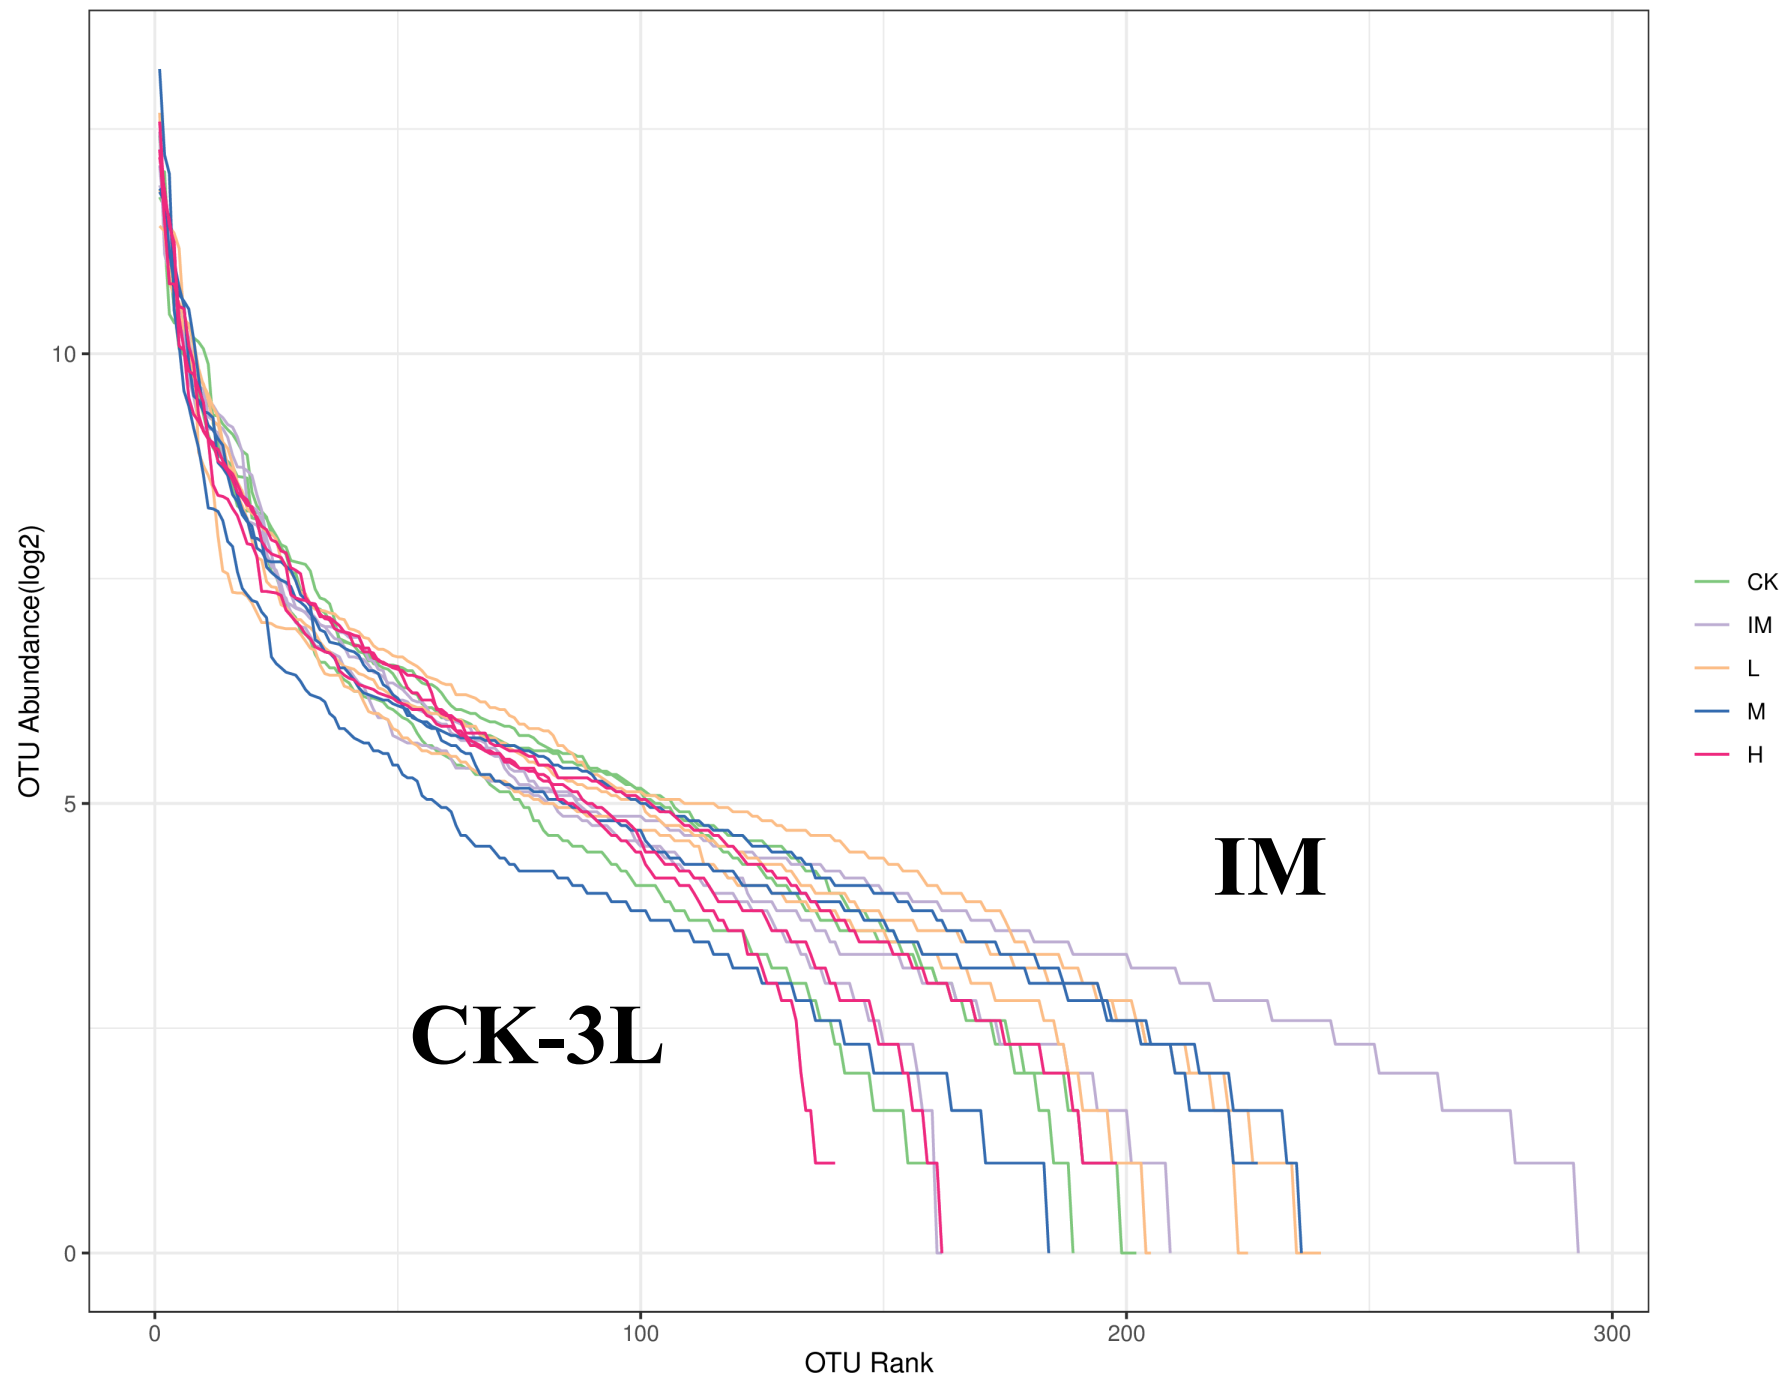

Supplement: Supplementary file 1 [file 90daf32b8a123ee82935eaf0.pdf]
